# Supplementary material
Source: publisher figshare collection journal article supplement (https://sage.figshare.com/ndownloader/files/11183960)

1

## Design brief

### PATIENT DECISION AID

#### 3. Mortality associated with partial foot amputation.

Q: Why do we need to talk about death (mortality)?

A: Most people who need a partial foot amputation are older and have peripheral vascular disease, often in combination with diabetes and other long term health problems (e.g., heart or kidney problems). The combination of these health problems affect the whole body, not just the feet. On their own, these health problems increase the risk of death (mortality).

Research tells us that 1 year after partial foot amputation, about XX% of people will have died and by 5 years, this number increases to XX%. We can't predict who will die, but research suggests that people with more health problems have a shorter life expectancy after partial foot amputation. Usually, amputation isn't the cause of death, but is part of a larger picture of ill health.

#### 4. Mobility after partial foot amputation.

Q: Will I walk again?

A: Yes, most people will walk again after their partial foot amputation. Unfortunately, there is limited research about how mobility changes after partial foot amputation. Studies have focused on people with transmetatarsal amputation (i.e., amputation through the middle of the foot). It is not clear whether different levels of partial foot amputation (e.g., toe amputation) result in better or worse mobility.

One year after transmetatarsal amputation, about 35% of people will have the same level of mobility they had prior to becoming ill. Most people lose some mobility after partial foot amputation but still remain independent. Some people that lose mobility may need to use a mobility aid, like a walking stick<sup>6</sup>.

#### 5. Quality-of-Life after partial foot amputation

Q: What will my quality of life be like after partial foot amputation?

#### 6. Psychosocial outcomes after partial foot amputation.

Q: Is it common to feel depressed or anxious after partial foot amputation?

2

## Concept

# MOBILITY

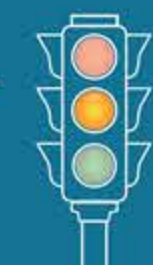

### Q:

### Will I walk again?

### A:

Yes, most people will walk again after their partial foot amputation. Unfortunately, there is limited research about how mobility changes after partial foot amputation. Studies have focused on people with transmetatarsal amputation (i.e., amputation through the middle of the foot). It is not clear whether different levels of partial foot amputation (e.g., toe amputation) result in better or worse mobility.

One year after transmetatarsal amputation, about 35% of people will have the same level of mobility they had prior to becoming ill.<sup>6</sup> Most people lose some mobility after partial foot amputation but still remain independent.<sup>6</sup> Some people that lose mobility may need to use a mobility aid, like a walking stick.

Mobility 12 months after partial foot amputation<sup>6</sup>

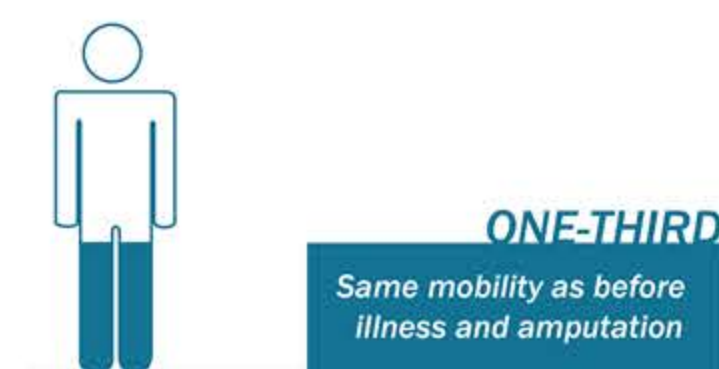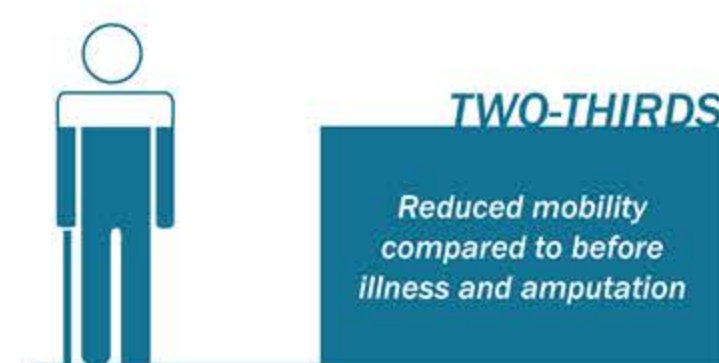

3

## Prototype

# MOBILITY

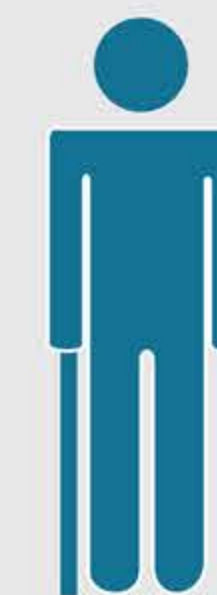

- Following partial foot amputation, most people lose some mobility but still remain independent. You may need to use a mobility aid, like a walking stick.

- There is limited research about how mobility changes after partial foot amputation. We do not know if different levels of partial foot amputation (e.g., toe amputation) result in better or worse mobility<sup>1</sup> because most research has focused on people with amputation through the middle of the foot (transmetatarsal amputation).

- Mobility appears to be similar for people with partial foot and below-knee (transtibial) amputation.

Mobility 12 months after partial foot amputation

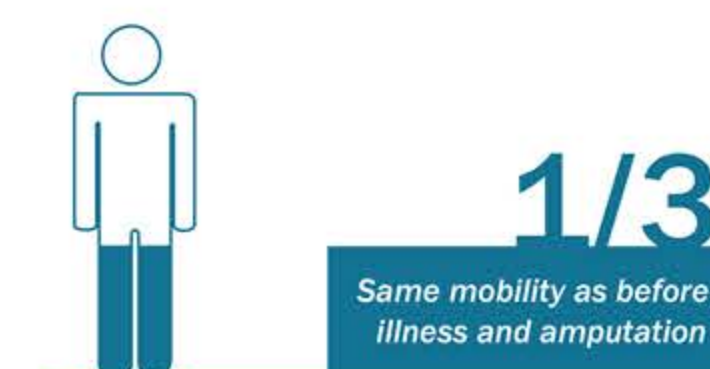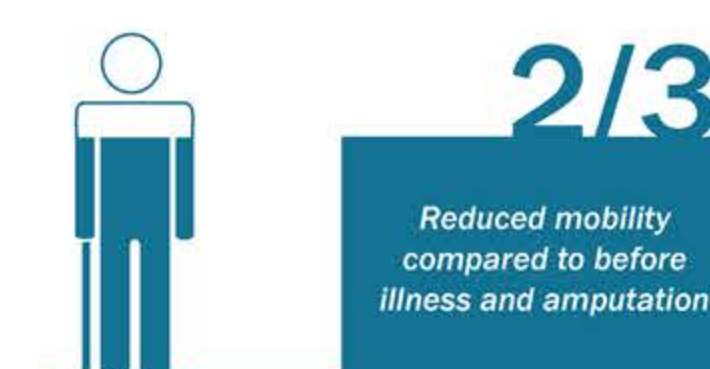

4

## Final

# MOBILITY

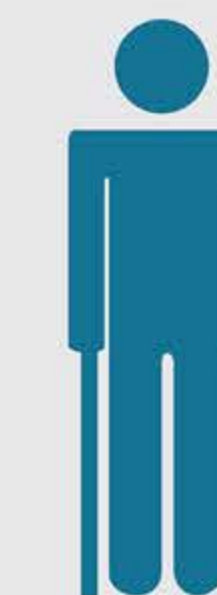

- Mobility describes how easily you can get around using your prosthesis in a variety of everyday activities such as walking indoors, outside in bad weather, going down stairs or while carrying an object.
- Following partial foot amputation, most people lose some mobility but still remain independent. You may need to use a mobility aid, like a walking stick.
- We do not know if different levels of partial foot amputation (e.g., toe amputation) result in better or worse mobility because most research has focused on people with amputation through the middle of the foot (transmetatarsal amputation).
- Mobility appears to be similar for people with partial foot and below knee (transtibial) amputation.

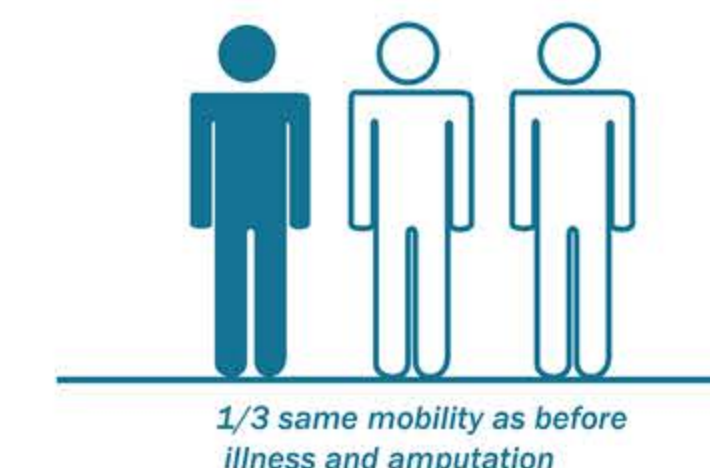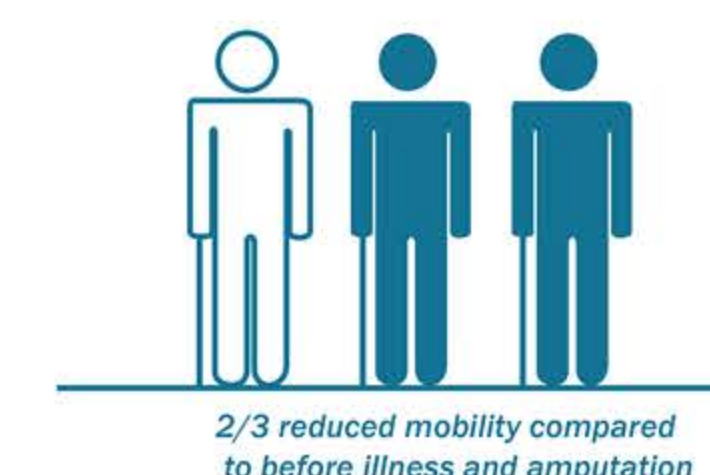

Supplement: Supplementary file 1 [file 11183960]
